# Supplementary material for: Manufacturing artificial bone allografts: a perspective
Source: PubMed Central journal article supplement — Biomater Transl. 2022 Mar 28;3(1):65–80. doi: 10.12336/biomatertransl.2022.01.007 (PMC9255790; doi:10.12336/biomatertransl.2022.01.007), 2022-03-28
Supplement: bt-03-01-65-s001.pdf [file bt-03-01-65-s001.pdf]

**Additond Table 1. Commercially-available demineralised bone matrix\***

| Source company            | Product            | DBM (%)                                               | Carrier                                                              | Form                                                                  | Indication                                                         |
|---------------------------|--------------------|-------------------------------------------------------|----------------------------------------------------------------------|-----------------------------------------------------------------------|--------------------------------------------------------------------|
| Allosource                | AlloFuse           | 36 (putty),<br>29 (gel)                               | Reverse phase medium                                                 | Putty, gel                                                            | Bone void filler/<br>bone graft extender                           |
| Alphatech                 | AlphaGRAFT         | 80                                                    | Acellular matrix                                                     | Paste                                                                 | Bone void filler                                                   |
| Amend Surgical            | NanoFUSE           | ND                                                    | 45S5 bioactive glass                                                 | Putty                                                                 | Bone void filler                                                   |
| Bactarin<br>International | OsteoSelect        | 74                                                    | Carboxymethylcellulose,<br>phosphate-buffered saline                 | Putty                                                                 | Bone void filler                                                   |
|                           | Osteosponge        | 100                                                   | No carrier                                                           | Block, Disc, SC,<br>strip filler                                      | Bone void filler                                                   |
| Exactech                  | Altiva             | ND                                                    | Gelatine                                                             | Paste                                                                 | Bone void filler                                                   |
|                           | Optefil            | 24                                                    | Gelatine                                                             | Paste                                                                 | Bone void filler                                                   |
|                           | Opteform           | ND                                                    | Cortical and cancellous bone chips<br>suspended in collagen-gelatine | Paste                                                                 | Bone void filler                                                   |
| Integra                   | Accell<br>Connexus | 70                                                    | Poloxamer reverse phase medium                                       | Putty                                                                 | Bone void filler/<br>bone graft extender                           |
|                           | Accell Evo3        | 70                                                    | Poloxamer reverse phase medium<br>and cancellous bone chips          | Putty                                                                 | Bone void filler                                                   |
|                           | Accell TBM         | 100                                                   | No carrier                                                           | Strip                                                                 | Bone void filler/<br>bone graft extender                           |
|                           | DynaGraft III      | ND                                                    | Poloxamer reverse phase medium                                       | Putty, gel                                                            | Bone void filler/<br>bone graft extender                           |
|                           | OrthoBlast         | ND                                                    | Poloxamer reverse phase medium                                       | Paste                                                                 | Bone void filler/bone                                              |
|                           | OrthoBlast II      | ND                                                    | Poloxamer reverse phase medium                                       | Putty, paste                                                          | Bone void filler/bone                                              |
| Lattice Biologics         | H-GENIN            | 100                                                   | No carrier                                                           | Putty, crush-mix,<br>spongeous blocks,<br>powder                      | Nonmanipulated<br>substance                                        |
| LifeNet Health            | Optium             | ND                                                    | Glycerol                                                             | Putty, gel                                                            | Bone void filler                                                   |
| Medtronic                 | DBX                | 31 (putty),<br>26 (paste),<br>35 (mix),<br>45 (strip) | Hyaluronic acid                                                      | Putty, paste, mix,<br>strip                                           | Bone void filler                                                   |
|                           | GRAFTON            |                                                       | Unpublished                                                          | Gel, flex, putty,<br>matrix, CRUNCH®,<br>orthoblend, strips,<br>paste | Bone void filler/<br>bone graft extender                           |
|                           | Osteofil           | 24                                                    | Collagen                                                             | Paste, strip                                                          | Bone void filler                                                   |
|                           | Progenix Plus      | 60                                                    | Collagen type 1 (bovine) and<br>sodium alginate                      | Putty                                                                 | Bone void filler/<br>bone graft extender/<br>bone graft substitute |
|                           | Progenix Putty     | 70                                                    | Collagen type 1 (bovine) and<br>sodium alginate                      | Putty                                                                 | Bone void filler/<br>bone graft extender/<br>bone graft substitute |
|                           | VIAGRAF            | ND                                                    | Glycerol                                                             | Paste, strip                                                          | Bone void filler                                                   |
| Osteotech                 | Grafton            | 17 to 31                                              | Glycerol                                                             | Paste, strip                                                          | Bone void filler/<br>bone graft extender/<br>bone graft substitute |
| Penta Biomedical          | BioSet             | 24                                                    | Porcine gelatine                                                     | Paste, strip, disc,<br>with or without<br>cancellous bone<br>chips    | Bone void filler                                                   |
| RTI Surgical®,<br>Inc.    | BioSet DBM         | 24 by<br>weight                                       | Porcine gelatine                                                     | Paste, strip, disc,<br>with or without<br>cancellous chips            | Bone void filler                                                   |
| Stryker                   | AlloCraft          | 80                                                    | Acellular matrix                                                     | Paste                                                                 | Bone void filler                                                   |
| Wright Medical            | Allomatrix         | 40 to 86                                              | Calcium sulphate                                                     | Paste                                                                 | Bone void filler/bone<br>graft extender                            |
|                           | PRO-STIM           | 40                                                    | Calcium sulphate and calcium<br>phosphate                            | Paste, putty                                                          | Bone void filler                                                   |

**Additioend Table 1.. Continued**

| <b>Source company</b>                              | <b>Product</b> | <b>DBM (%)</b>            | <b>Carrier</b> | <b>Form</b>                                | <b>Indication</b>                                                        |
|----------------------------------------------------|----------------|---------------------------|----------------|--------------------------------------------|--------------------------------------------------------------------------|
| Zimmer                                             | Puros® DBM     | 10000                     | No carrier     | Putty, putty with cortico-cancellous chips | Non 510(k) regulated – non-manipulated substance                         |
| Zimmer Biomet                                      | InterGro       | 40 (putty),<br>35 (paste) | Lecithin       | Putty, paste                               | Bone void filler/bone graft extender                                     |
| NHS Blood & Transplant:<br>Tissue and Eye services | DBM Powder     | 100                       | No carrier     | Particle size–250–710 mm jar               | Light and electrostatic - To be mixed with blood to enhance osteogenesis |
|                                                    | DBM Paste      | 55                        | Glycerol (v/v) | Paste. 1, 5, 10 mL blunt ended syringe     | Bone void filler                                                         |
|                                                    | DBM Putty      | 65                        | Glycerol (v/v) | Putty. 1, 5, 10 mL blunt ended syringe     | Bone void filler                                                         |

Note: \*Adapted from Shehadi and Elzein<sup>36</sup> and Zhang et al.<sup>37</sup> DBM: demineralised bone matrix; ND: no data; SC: subchondral.
